# Supplementary material for: Characterization of the first double-stranded RNA bacteriophage infecting Pseudomonas aeruginosa
Source: PubMed Central journal article supplement (PMC5146939; doi:10.1038/srep38795), 2016-12-09

## Supplement information

### Characterization of the first double-stranded RNA bacteriophage infecting *Pseudomonas aeruginosa*

Yuhui Yang<sup>1</sup>, Shuguang Lu<sup>1</sup>, Wei Shen<sup>1</sup>, Zhao Xia<sup>1</sup>, Mengyu Shen<sup>1</sup>, Yinling Tan<sup>1</sup>, Gang Li<sup>1</sup>, Ming Li<sup>1</sup>, Jing Wang<sup>1</sup>, Fuquan Hu<sup>1\*</sup>, Shuai Le<sup>1\*</sup>

<sup>1</sup> Department of Microbiology, Third Military Medical University, Chongqing, 400038, China

\* To whom correspondence should be addressed to: Fuquan Hu, Department of Microbiology, Third Military Medical University, Chongqing 400038, China. Tel.: 86-23-68752834. Fax: 86-25-68752834. E-mail: hufuquan2009@yahoo.cn; Shuai Le, Department of Microbiology, Third Military Medical University, Chongqing 400038, China.. E-mail: leshuai2004@qq.com;

**Key words:** *Pseudomonas aeruginosa*, double stranded RNA phage, Cystoviridae

**Supplementary Table S1:**List of all the ssRNA phages from GenBank Genomes database.

| <b>Genome</b>                             | <b>Accession</b> | <b>Length</b> |
|-------------------------------------------|------------------|---------------|
| <b>Acinetobacter phage AP205</b>          | NC_002700        | 4268 nt       |
| <b>Caulobacter phage phiCb5</b>           | NC_019453        | 3762 nt       |
| <b>Enterobacteria phage BZ13</b>          | NC_001426        | 3466 nt       |
| <b>Enterobacteria phage C-1 INW-2012</b>  | NC_019920        | 3523 nt       |
| <b>Enterobacteria phage FI</b>            | NC_028902        | 4184 nt       |
| <b>Enterobacteria phage FI sensu lato</b> | NC_004301        | 4276 nt       |
| <b>Enterobacteria phage Hgal1</b>         | NC_019922        | 3562 nt       |
| <b>Enterobacteria phage M</b>             | NC_019707        | 3405 nt       |
| <b>Enterobacteria phage MS2</b>           | NC_001417        | 3569 nt       |
| <b>Enterobacteria phage Qbeta</b>         | NC_001890        | 4215 nt       |
| <b>Pseudomonas phage PP7</b>              | NC_001628        | 3588 nt       |
| <b>Pseudomonas phage PRR1</b>             | NC_008294        | 3573 nt       |

**Supplementary Table S2:**List of all the dsRNA phages from GenBank Genomes

database.

| <b>Genome</b>                                   | <b>Isolated from</b> | <b>Accession</b> | <b>Length<br/>(nt)</b> |
|-------------------------------------------------|----------------------|------------------|------------------------|
| <b>Pseudomonas phage phi 12</b>                 | U.S.A                | NC_004174        | 2322                   |
|                                                 |                      | NC_004175        | 4100                   |
|                                                 |                      | NC_004173        | 6751                   |
| <b>Pseudomonas phage phi13</b>                  | U.S.A                | NC_004170        | 2981                   |
|                                                 |                      | NC_004171        | 4213                   |
|                                                 |                      | NC_004172        | 6458                   |
| <b>Pseudomonas phage phi2954</b>                | U.S.A                | NC_012091        | 6501                   |
|                                                 |                      | NC_012093        | 2578                   |
|                                                 |                      | NC_012092        | 3606                   |
| <b>Pseudomonas phage phi6</b>                   | U.S.A                | NC_003715        | 6374                   |
|                                                 |                      | NC_003716        | 4063                   |
|                                                 |                      | NC_003714        | 2948                   |
| <b>Pseudomonas phage phi8</b>                   | U.S.A                | NC_003301        | 3192                   |
|                                                 |                      | NC_003299        | 7051                   |
|                                                 |                      | NC_003300        | 4741                   |
| <b>Pseudomonas phage phiNN</b>                  | Finnish              | KJ957166         | 2945                   |
|                                                 |                      | KJ957165         | 3814                   |
|                                                 |                      | KJ957164         | 6503                   |
| <b>Pseudomonas phage phiYY<br/>(This study)</b> | China                | KX074203         | 3004                   |
|                                                 |                      | KX074202         | 3862                   |
|                                                 |                      | KX074201         | 6648                   |

**Supplementary Table S3:** The detailed phage sensitivity rate for each cluster and hospital. The number after “/” is the total strains in this cluster and the number before “/” is the number of phage sensitive colonies.

| Hospital   | Southwest Hospital | Xinqiao Hospital | Daping Hospital | West China Hospital | Sichuan Provincial People's Hospital | Xijing Hospital | Henan Provincial People's Hospital |
|------------|--------------------|------------------|-----------------|---------------------|--------------------------------------|-----------------|------------------------------------|
| Cluster 1  | 9/18               | 0/1              | 1/2             |                     |                                      | 0/1             | 7/13                               |
| Cluster 2  | 0/2                |                  |                 |                     |                                      |                 | 4/4                                |
| Cluster 3  | 0/3                |                  |                 |                     |                                      |                 |                                    |
| Cluster 4  | 3/10               | 3/3              | 1/1             | 1/2                 | 1/1                                  | 1/1             | 1/2                                |
| Cluster 5  | 18/26              | 4/10             | 2/2             | 4/11                | 5/16                                 | 6/11            | 5/22                               |
| Cluster 6  | 1/6                |                  |                 |                     |                                      |                 |                                    |
| Cluster 7  | 3/10               |                  |                 | 0/3                 |                                      |                 |                                    |
| Cluster 8  |                    |                  | 1/1             |                     |                                      |                 | 1/5                                |
| Cluster 9  | 4/15               | 0/1              | 5/14            | 0/1                 | 0/2                                  | 1/2             | 0/1                                |
| Cluster 10 | 0/2                |                  |                 |                     |                                      |                 | 1/1                                |
| Cluster 11 | 1/1                |                  |                 |                     |                                      |                 |                                    |
| Cluster 12 |                    |                  |                 |                     |                                      | 1/1             |                                    |
| Cluster 13 | 1/1                |                  |                 |                     |                                      |                 |                                    |
| Cluster 14 |                    |                  |                 |                     |                                      |                 | 1/1                                |
| Cluster 15 |                    | 1/2              |                 |                     |                                      |                 |                                    |
| Cluster 16 |                    | 1/1              |                 |                     |                                      |                 |                                    |

**Supplementary Fig. S1:** A representative picture of the ERIC-PCR profiles from *P. aeruginosa* strains. M: DNA maker; lanes 1–16, *P. aeruginosa* isolates.

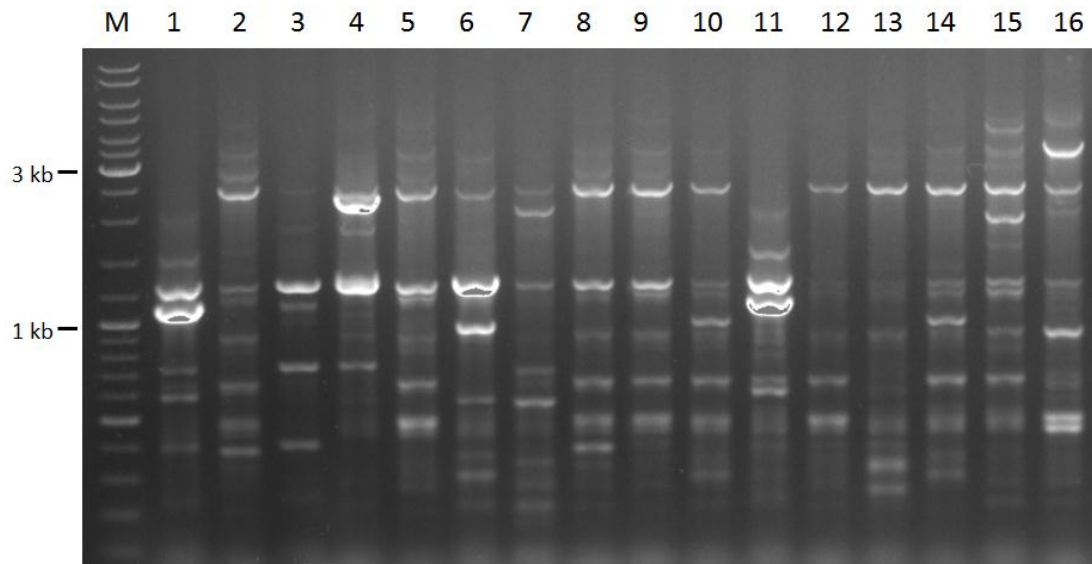

Supplement: srep38795-s1.pdf [file srep38795-s1.pdf]
